# Supplementary material for: Validation of Serum Calprotectin Relative to Other Biomarkers of Infection in Febrile Infants Presenting to the Emergency Department
Source: MDPI journal article supplement (doi:10.3390/antibiotics13050425), 2024-05-07
Supplement: s1 [file s1]

**Table S1.** Analytical information for serum calprotectin assay (GCAL®, Gentian AS) on an Abbott Architect instrument (The Hospital for Sick Children, Toronto, ON, Canada).

| Characteristic                                    | Information                                                                                                           |
|---------------------------------------------------|-----------------------------------------------------------------------------------------------------------------------|
| Limit of Quantification (manufacturer defined)    | 0.30 mg/L                                                                                                             |
| Limit of Detection (manufacturer defined)         | 0.15 mg/L                                                                                                             |
| Analytical Measuring Range (manufacturer defined) | 0.43-20.66 mg/L                                                                                                       |
| Precision                                         | Level 1 [mean (CV)]: 1.04 mg/L (7.5%)<br>Level 2 [mean (CV)]: 10.1 mg/L (1.5%)                                        |
| Linearity                                         | Range Evaluated: 0–19 mg/L<br>Slope: 0.97<br>Intercept: 0.12 mg/L<br>R <sup>2</sup> : 0.999                           |
| Method Comparison                                 | Range Evaluated: 0–19 mg/L<br>Slope: 0.9502<br>Intercept: -0.08<br>R <sup>2</sup> : 0.997<br>Average Bias: -0.18 mg/L |
